# Supplementary material
Source: publisher figshare collection journal article supplement (https://brill.figshare.com/articles/dataset/_/13482612)
Supplement: Supplementary file 2 [file 1]

# **Morphological evidence for paraphyly of *Holopothrips* Hood (Thysanoptera: Phlaeothripidae), a Neotropical genus of gall- inducing thrips**

**Mariana F. Lindner<sup>a,\*</sup>, Augusto Ferrari<sup>a,b</sup> and Adriano Cavalleri<sup>a,b</sup>**

<sup>a</sup>Departamento de Zoologia, Instituto de Biociências, Universidade Federal do Rio Grande do Sul (UFRGS), Avenida Bento Gonçalves 9500, 91501–970, Porto Alegre, RS, Brazil

<sup>b</sup>Laboratório de Entomologia, Sistemática e Biogeografia (LESB), Matéria Zoologia, Instituto de Ciências Biológicas (ICB), Universidade Federal do Rio Grande (FURG),

Avenida Itália, km 8, bairro Carreiros, 96201–900, Rio Grande, RS, Brazil

\*Corresponding author, e-mail: mflindner@hotmail.com

## **Supplementary material**

### **Supplementary Information**

**File S1.** Illustrated character list.

**File S2.** Matrix D1.

**File S3.** Matrix D2.

**File S4.** Matrix D1Con.

**File S5.** Matrix D2Con.

**File S6.** EW search script.

**File S7.** IW search script.

**File S8.** BEW script.

**File S9.** BIW script.

**File S10.** Analysis D1-EW, strict consensus of most parsimonious trees obtained.

**File S11.** Analysis D1-IW, most parsimonious tree obtained.

**File S12.** Analysis D2-EW, strict consensus of most parsimonious trees obtained.

**File S13.** Analysis D2-IW, most parsimonious tree obtained.

**File S14.** Analysis D1Con-EW, most parsimonious tree obtained.

**File S15.** Analysis D1Con-IW, most parsimonious tree obtained.

**File S16.** Analysis D2Con-EW, strict consensus of most parsimonious trees obtained.

**File S17.** Analysis D2Con-IW, most parsimonious tree obtained.
